# Supplementary material
Source: PubMed Central journal article supplement (PMC3074421)

# Supplemental Figure 1

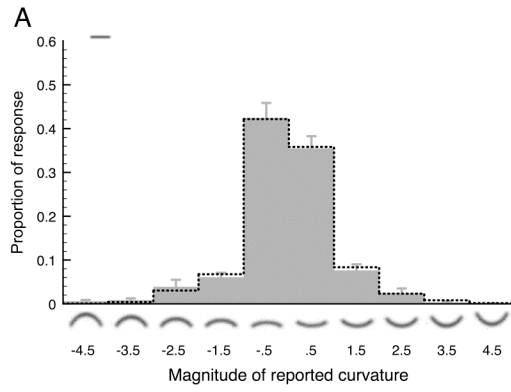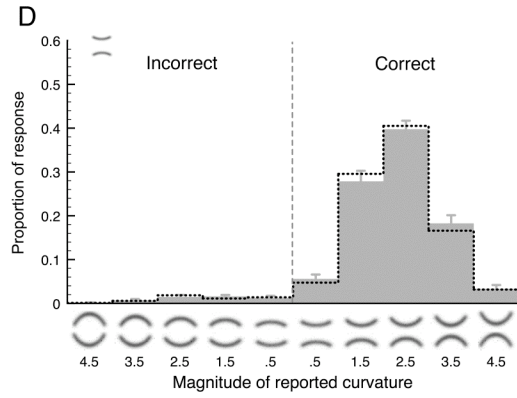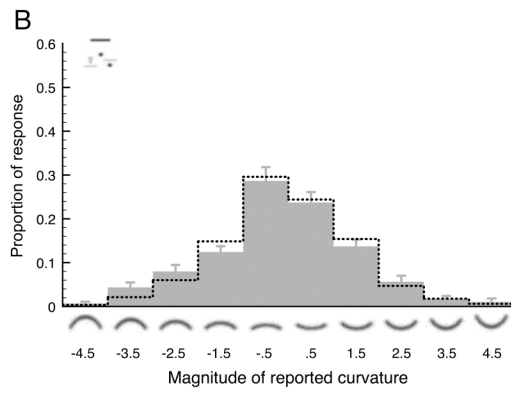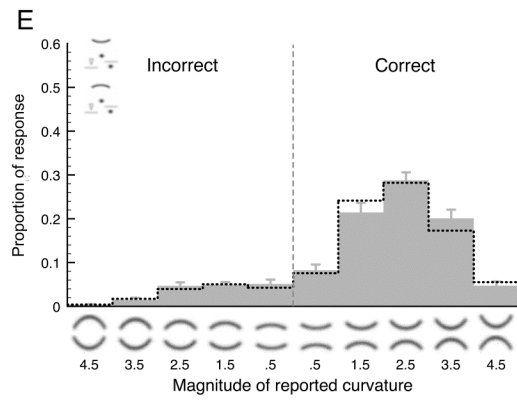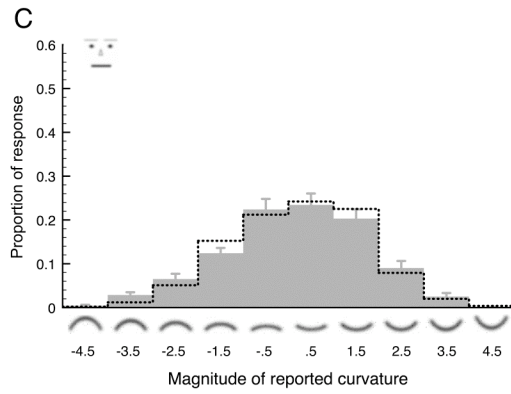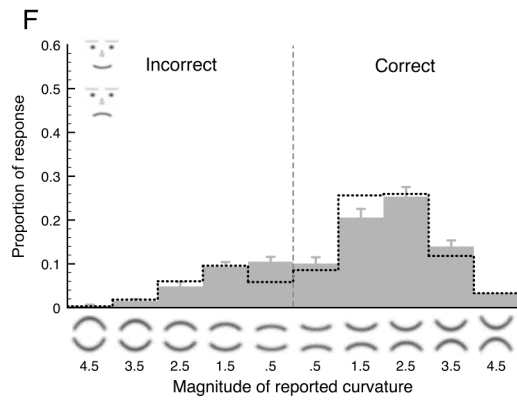

Supplement: supp_00061.2010_figS1.pdf [file supp_00061.2010_figS1.pdf]

# Supplemental Figure 2

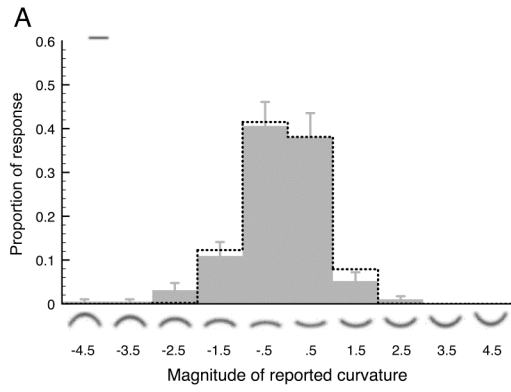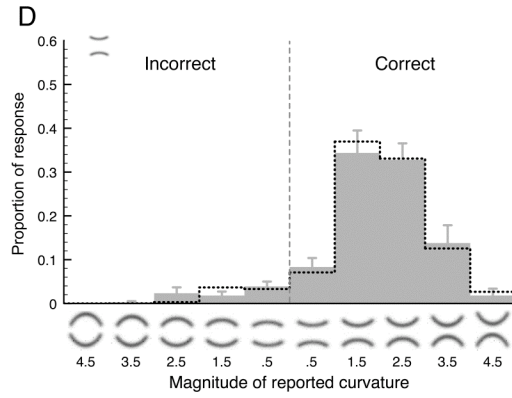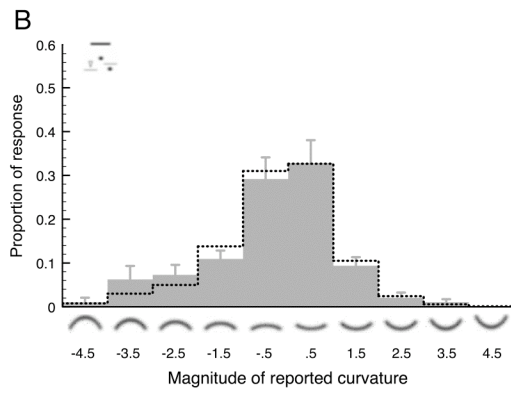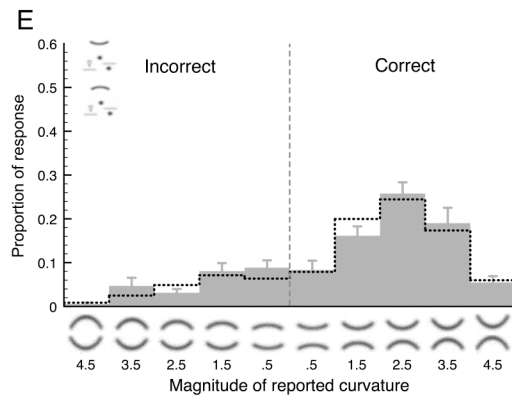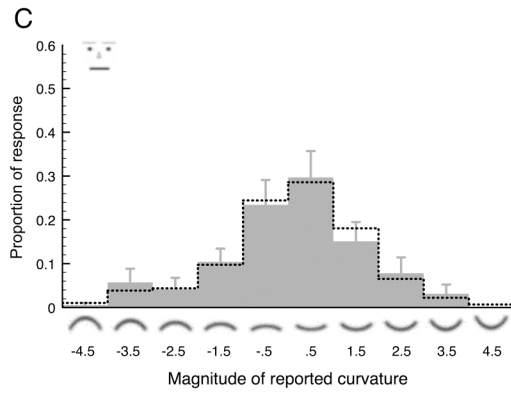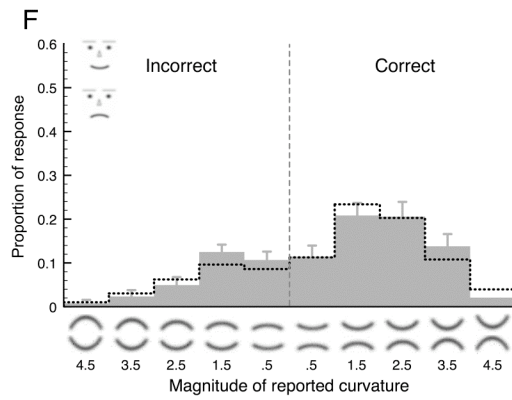

Supplement: supp_00061.2010_figS2.pdf [file supp_00061.2010_figS2.pdf]
